# Supplementary material
Source: publisher figshare collection journal article supplement (https://rs.figshare.com/ndownloader/files/12699458)

## Supplementary Material

Disruption of skin microbiota contributes to salamander disease

Molly C. Bletz<sup>1,2</sup>, Moira Kelly<sup>3</sup>, Joana Sabino Pinto<sup>2</sup>, Emma Bales<sup>2</sup>, Sarah Van Praet<sup>3</sup>, Wim Bert<sup>4</sup>, Filip Boyen<sup>3</sup>, Miguel Vences<sup>2</sup>, Sebastian Steinfartz<sup>2</sup>, Frank Pasmans<sup>3</sup>, An Martel<sup>3</sup>

- 1) Department of Biology, University of Massachusetts Boston, 100 Morrissey Blvd. Boston MA, 02125
- 2) Zoological Institute, Technical University of Braunschweig, Braunschweig, DE 38106
- 3) Department of Pathology, Bacteriology and Avian Diseases, Faculty of Veterinary Medicine, Ghent University, B-9820 Merelbeke, Belgium
- 4) Department of Biology, Nematology Research Unit, Faculty of Science, Ghent University, 9000 Ghent, Belgium

## Supplementary Methods

### **Bsal zoospore harvesting for inhibition assays:**

*Bsal* zoospores were obtained from filtering *Bsal* cultures maintained in culture flasks. More specifically, after 5 days of growth in TGH media this media was exchanged with sterile artificial pond water and incubated overnight. This stimulates the release of zoospores. The next day, the water was collected from the flask and centrifuged to pellet the released zoospores. The pelleted cells were then re-suspended in fresh media and filtered to remove any sporangia. The filtered zoospore suspension was then quantified, diluted to  $1 \times 10^6$  zoospores/ml, and added to the assay wells.

**Detailed methods for *Bsal* growth inhibition assays** Briefly, zoospores were obtained from filtering *Bsal* cultures maintained in culture flasks (see supplemental methods for detailed protocol). *Bsal* zoospores were grown in the presence of the cell-free supernatant of each bacterial isolate in triplicate. Assay plates were incubated at 18° C for 7 days and optical density readings occurred on day 0, 4, 7 and 10. Bacterial CFS was collected from liquid cultures grown for 3 days on a shaker (250 rpm) and filtered through 0.22  $\mu$ m filter. Bacteria were not co-cultured with *Bsal* during cell-free supernatant preparation (CFS).

**Bacterial selection criteria for bacterial addition experiment:** Bacteria were selected using the following criteria: (1) consistent and distinct function across bacterial isolates assigned to the same bacterial OTU at 97% similarity (either consistent inhibition or enhancement in > 50% of cultured isolates), (2) commonly cultured from skin (cultured from > 5 individuals), and (3) present in fire salamander skin communities using next generation sequencing approaches.

**Detailed methods for 16S rRNA characterization of communities:** Only forward reads were used because reverse reads typically suffer from lower quality [35]. Quality filtered sequences were clustered into sub-operational taxonomic units (sOTUs) using Deblur [36]. Within this workflow, sequences were trimmed to 150 bp to maintain only high quality bases within each sequence, and sOTU clusters with less than 10 reads were removed as per the recommendations in Bokulich et al. [37]. Taxonomy was assigned with the naïve Bayesian Classifier and the RDP database [29]. A phylogenetic tree was built in QIIME using fasttree [30]. Samples were subsequently normalized at 5,818 reads per sample (depth chosen based on read count of lowest sample). The alpha diversity measures, OTU richness, Effective number of sOTUs (exp(Shannon)) [38], and Faith's phylogenetic diversity were calculated for all samples, and beta diversity (i.e. community structure) was calculated as the weighted Unifrac, unweighted Unifrac, Bray Curtis and Binary Jaccard pairwise distances in QIIME.

**Detailed methods for MALDI-TOF:** The samples were cultured for 24 hours at 15°C on Columbia agar with sheep blood (Oxoid, Wesel, Germany). One colony per sample was smeared upon a MALDI polished steel target plate, covered with 1  $\mu$ l HCCA matrix and, after air drying, loaded into the MALDI-TOF mass spectrometer. The spectra were obtained in linear positive mode with set-up values set as follows: ion source 1 voltage, 19,5 kV; ion source 2 voltage, 18,3 kV; lens voltage, 7 kV; mass range, 2–20 kDa; peak resolution, >400. The final spectrum was the sum of 6 single spectra, each obtained by 200 laser shots on random target spot positions (1200

shots in total). Spectra acquisition, peak picking, baseline subtraction, smoothing and final identification were performed with the standard biotyper settings of the MBT Compass software version 4.1. (Bruker Daltonik), which included a RUO database of 6,120 mean spectra projections (MSP) supplemented with the MSP's of the respective *Stenotrophomonas* and *Pseudomonas* isolates, obtained according to the manufacturer's guidelines. Identifications of the respective isolates was reported for score values higher than 2.

### Supplementary Tables and Figures

**Supplementary Table 1.** Field sampling locations across Germany and sample sizes for skin microbiome analysis. Locations with asterisk were also used for qPCR estimates of bacterial abundance.

|       | Locations       | # individuals |
|-------|-----------------|---------------|
| Eifel | ER              | 2             |
|       | Fischbach*      | 38            |
|       | Haftenbach      | 40            |
|       | Kallerbach*     | 18            |
|       | Lamersiefen     | 18            |
|       | Rosbach         | 46            |
|       | Sauerbach       | 22            |
|       | Solchbachtal*   | 14            |
|       | Weisse Wehe     | 7             |
|       | Zweifallshammer | 33            |
|       | *               |               |
|       | Harz            | 8             |
|       | Solling         | 29            |

**Supplementary Table 2.** Sample sizes and the number of bacterial isolates cultured from the skin of fire salamanders from multiple populations across Germany.

| Location    | # bacteria isolates | # individuals |
|-------------|---------------------|---------------|
| Eifel       | 83                  | 6             |
| Harz        | 47                  | 7             |
| Kottenforst | 176                 | 34            |
| Liekwegen   | 25                  | 2             |
| Solling     | 140                 | 21            |
| Waldeck     | 161                 | 15            |
| Wolfsburg   | 76                  | 9             |

**Supplementary Table 3.** Functional capacities of bacterial isolates isolated from fire salamander skin that were re-tested multiple times using optical density-based growth assays. **I = inhibiting**, **E = enhancing**, **N= no effect on growth**

| Bacterial isolate |     | Growth assay replicates |   |   |   |   |   |
|-------------------|-----|-------------------------|---|---|---|---|---|
|                   |     | ID                      | 1 | 2 | 3 | 4 | 5 |
|                   | 205 | I                       | E | N |   |   |   |
|                   | 335 | I                       | E | N |   |   |   |
|                   | 281 | I                       | E | I |   |   |   |
|                   | 473 | I                       | E | E | E | E |   |
|                   | 798 | I                       | E | E | E | E |   |
|                   | 737 | I                       | E | E | E | E |   |
|                   | 908 | E                       | N | N | I | N |   |
|                   | 849 | E                       | I | I | I | I |   |
|                   | 850 | E                       | I | I | I | I |   |
|                   | 235 | E                       | N | I |   |   |   |
|                   | 277 | E                       | N | I |   |   |   |
|                   | 540 | E                       | N | I |   |   |   |
|                   | 393 | N                       | N | I |   |   |   |
|                   | 23  | N                       | N | N | E | E |   |
|                   | 2   | N                       | E | N |   |   |   |
|                   | 369 | N                       | N | N | N | E |   |
|                   | 370 | N                       | E | N |   |   |   |

**Supplementary Table 4.** Differentially abundant bacterial taxa between *Bsal* exposed and control fire salamanders as identified through the LEfSe method. Bacterial taxa with an asterisk indicate which ones are presented in Figure 1.

| Treatment | Bacterial Taxa                                                   | LDA   | p-value |
|-----------|------------------------------------------------------------------|-------|---------|
| Control   | Actinobacteria Actinobacteria Actinomycetales                    | 4.560 | 0.006   |
|           | Actinobacteria Actinobacteria Actinomycetales                    | 4.560 | 0.006   |
|           | Actinobacteria Actinobacteria Actinomycetales OTU0048*           | 4.560 | 0.006   |
|           | Actinobacteria Actinobacteria Actinomycetales                    |       |         |
|           | Microbacteriaceae <i>Leucobacter</i> OTU0124*                    | 3.562 | 0.030   |
|           | Bacteroidetes Cytophagia                                         | 3.829 | 0.016   |
|           | Bacteroidetes Cytophagia Cytophagales                            | 3.829 | 0.016   |
|           | Bacteroidetes Cytophagia Cytophagales Cytophagaceae              | 3.829 | 0.016   |
|           | Bacteroidetes Cytophagia Cytophagales Cytophagaceae              |       |         |
|           | <i>Dyadobacter</i>                                               | 3.726 | 0.037   |
|           | Bacteroidetes Cytophagia Cytophagales Cytophagaceae              |       |         |
|           | <i>Dyadobacter</i> OTU0064*                                      | 3.612 | 0.037   |
|           | Bacteroidetes Sphingobacteriia Sphingobacteriales                |       |         |
|           | Sphingobacteriaceae <i>Pedobacter</i>                            | 3.673 | 0.025   |
| Infected  | Bacteroidetes Flavobacteriia Flavobacteriales Weeksellaceae      |       |         |
|           | <i>Chryseobacterium</i> OTU0231*                                 | 3.594 | 0.022   |
|           | Firmicutes Bacilli Lactobacillales                               | 3.545 | 0.036   |
|           | Firmicutes Bacilli Lactobacillales Streptococcaceae              |       |         |
|           | <i>Lactococcus</i> OTU0204*                                      | 3.585 | 0.026   |
|           | Fusobacteria                                                     | 3.623 | 0.025   |
|           | Fusobacteria Fusobacteriia                                       | 3.623 | 0.025   |
|           | Fusobacteria Fusobacteriia Fusobacteriales                       | 3.623 | 0.025   |
|           | Fusobacteria Fusobacteriia Fusobacteriales Fusobacteriaceae      | 3.623 | 0.025   |
|           | Fusobacteria Fusobacteriia Fusobacteriales Fusobacteriaceae      | 3.634 | 0.025   |
|           | Fusobacteria Fusobacteriia Fusobacteriales Fusobacteriaceae      |       |         |
|           | OTU0029*                                                         | 3.634 | 0.025   |
|           | Proteobacteria Gammaproteobacteria Aeromonadales                 | 4.118 | 0.036   |
|           | Proteobacteria Gammaproteobacteria Aeromonadales                 |       |         |
|           | Aeromonadaceae                                                   | 4.118 | 0.036   |
|           | Proteobacteria Gammaproteobacteria Aeromonadales                 |       |         |
|           | Aeromonadaceae                                                   | 4.118 | 0.036   |
|           | Proteobacteria Gammaproteobacteria Xanthomonadales               |       |         |
|           | Xanthomonadaceae <i>Stenotrophomonas acidaminiphila</i> OTU0014* | 3.594 | 0.006   |

**Supplementary Table 5.** Taxonomic identity and quantity of bacterial isolates cultured from liver tissue of *Bsal*-infected fire salamanders. Common habitats, host and associations based on NCBI Blast hits are provided with pathogen and disease related associations in bolded text.

| Taxonomic identity                                    | # isolates | # salamanders | Common habitats, host and associations                                                                                                                                                                                                                                                 |
|-------------------------------------------------------|------------|---------------|----------------------------------------------------------------------------------------------------------------------------------------------------------------------------------------------------------------------------------------------------------------------------------------|
| <i>Acinetobacter johnsonii</i><br>(Proteobacteria)    | 15         | 8             | amphibian skin associated microbiome (Madagascar); plant endophyte; <b>cerebrospinal fluid in humans with meningitis</b> , wastewater; water environments; microbiota of marine sponges; <b>emerging fish pathogen</b>                                                                 |
| <i>Chryseobacterium</i> sp.<br>(Bacteroidetes)        | 9          | 5             | amphibian skin-associated microbiota (Madagascar, New Zealand); soil bacterial communities; wastewater effluent; fish-associated microbiome; dairy environment, <b>disease aquatic animals</b> ; plant-associated phyllosphere; human skin microbiome; <b>diseased skin microbiome</b> |
| <i>Sphingobacterium faecium</i><br>(Bacteroidetes)    | 3          | 3             | truffle-associated bacteria; geothermal soils; aquatic rock associated biofilms; soil and water associated microbiomes; amphibian skin-associated microbiome; <b>bacteria on disease Brassicaceae plants</b> ; fish gut-associated microbiome;                                         |
| <i>Sphingobacterium multivorum</i><br>(Bacteroidetes) | 3          | 1             | endophytic plant bacteria; lichen-associated bacteria; soil environments; plant rhizosphere                                                                                                                                                                                            |
| <i>Flavobacterium succinicans</i><br>(Bacteroidetes)  | 2          | 1             | aquatic rock associated biofilms; cockroach microbiota; fish-associated microbiome; soil environments; plant-associated rhizosphere; <b>diseased fish</b>                                                                                                                              |
| <i>Myroides</i> sp. (Bacteroidetes)                   | 2          | 1             | phototrophic river biofilms; amphibian skin associated microbiomes (Madagascar); Bat guano; <i>Drosophila</i> microbiota; environmental microbiota; plant-associated phyllosphere; swine lagoon; river biofilms; soil rhizosphere                                                      |
| <i>Erwinia</i> sp. (Proteobacteria)                   | 2          | 2             | bacterial communities associated with aphids; bark beetle microbiota; bacteria on fresh fruit and vegetables; raw milk; mosquito-associated bacteria                                                                                                                                   |
| <i>Microbacterium maritopicum</i><br>(Actinobacteria) | 2          | 2             | coastal environments; bird plumage microbiota; soil environments; amphibian skin-associated microbiomes                                                                                                                                                                                |

|                                                            |   |   |                                                                                                                                                                                                                                                                                           |
|------------------------------------------------------------|---|---|-------------------------------------------------------------------------------------------------------------------------------------------------------------------------------------------------------------------------------------------------------------------------------------------|
| <i>Arthrobacter</i> sp.<br>(Actinobacteria)                | 1 | 1 | microbiota of cave environments, microbiota of marine sponges; marine and estuarine habitats; bacterial endophyte of plants; isolate from the surface of cheese; human skin microbiome; alpine soil and glacier cryoconite, Antarctic environments, soil from a bamboo plantation, sewage |
| <i>Arthrobacter psychrolactophilus</i><br>(Actinobacteria) | 1 | 1 | <b>skin microbiome associated with disease</b>                                                                                                                                                                                                                                            |
| <i>Flavobacterium</i> sp<br>(Bacteroidetes)                | 1 | 1 | <b>flares and treatment in children with atopic dermatitis</b> ; soil environments; plant-associated phyllosphere                                                                                                                                                                         |
| Enterobacteriaceae sp<br>(Proteobacteria)                  | 1 | 1 | plant roots; nematode gut microbiota; soil environments; <b>bacteria on disease Brassicaceae plants</b> ; beetle-associated microbiota                                                                                                                                                    |
| <i>Erwinia dispersa</i><br>(Proteobacteria)                | 1 | 1 | bacterial communities in boreal forest mushrooms; isolates from purple siltstone; gut symbionts in stinkbugs; plant root-associated bacteria                                                                                                                                              |
| <i>Klebsiella</i> sp. (Proteobacteria)                     | 1 | 1 | plant-associated microbiota; soil environments; water environments; nematode associated microbiota; date palm rhizosphere                                                                                                                                                                 |
| <i>Acinetobacter guillouiae</i><br>(Proteobacteria)        | 1 | 1 | amphibian skin associated microbiota (captive Atelopus); nematode associated microbiota; river sediment; <b>bacteria on diseased Brassicaceae plants</b> ; plant rhizosphere                                                                                                              |
| Unclassified bacteria                                      | 1 | 1 | closest match 95% to <i>Aeromonas salmonicida</i> - an etiological agent for furunculosis, <b>a disease that causes septicemia, haemorrhages, muscle lesions, inflammation of the lower intestine, spleen enlargement, and death in freshwater fish populations.</b>                      |

---

**Supplementary Table 6.** Re-isolation of bacterial isolates added to fire salamander skin throughout the experiment. Yes indicates positive detection of added bacterium, No indicates negative detection, and '--' indicates time points were individuals were no longer in the experiment.

| Treatment                   | Individual ID | 7d  | 14d | 21d | 28d | 35d | 42d | 49d | 56d | 63d | 70d | 77d |
|-----------------------------|---------------|-----|-----|-----|-----|-----|-----|-----|-----|-----|-----|-----|
| <i>Pseudomonas sp.</i>      | 8             | No  | No  | Yes | No  | --  | --  | --  | --  | --  | --  | --  |
|                             | 11            | No  | Yes | Yes | Yes | No  | --  | --  | --  | --  | --  | --  |
|                             | 12            | Yes | No  | Yes | No  | No  | No  | No  | No  | No  | --  | --  |
|                             | 16            | No  | No  | No  | No  | --  | --  | --  | --  | --  | --  | --  |
|                             | 18            | Yes | No  | No  | No  | Yes | --  | --  | --  | --  | --  | --  |
|                             | 19            | No  | Yes | Yes | No  | --  | --  | --  | --  | --  | --  | --  |
|                             | 27            | No  | Yes | No  | No  | No  | No  | No  | Yes | No  | No  | No  |
| <i>Stenotrophomonas sp.</i> | 1             | No  | No  | No  | No  | Yes | No  | No  | --  | --  | --  | --  |
|                             | 2             | Yes | No  | No  | Yes | --  | --  | --  | --  | --  | --  | --  |
|                             | 3             | No  | No  | No  | No  | --  | --  | --  | --  | --  | --  | --  |
|                             | 4             | Yes | No  | Yes | No  | --  | --  | --  | --  | --  | --  | --  |
|                             | 7             | Yes | No  | No  | Yes | --  | --  | --  | --  | --  | --  | --  |
|                             | 15            | No  | No  | Yes | Yes | No  | --  | --  | --  | --  | --  | --  |
|                             | 24            | No  | Yes | Yes | No  | --  | --  | --  | --  | --  | --  | --  |



**Supplementary Figure 1.** Bacterial taxonomic composition of fire salamander in natural populations at the order level. Ten populations from the Eifel region in Western Germany are including along with two populations (Harz and Solling) from Central Germany.

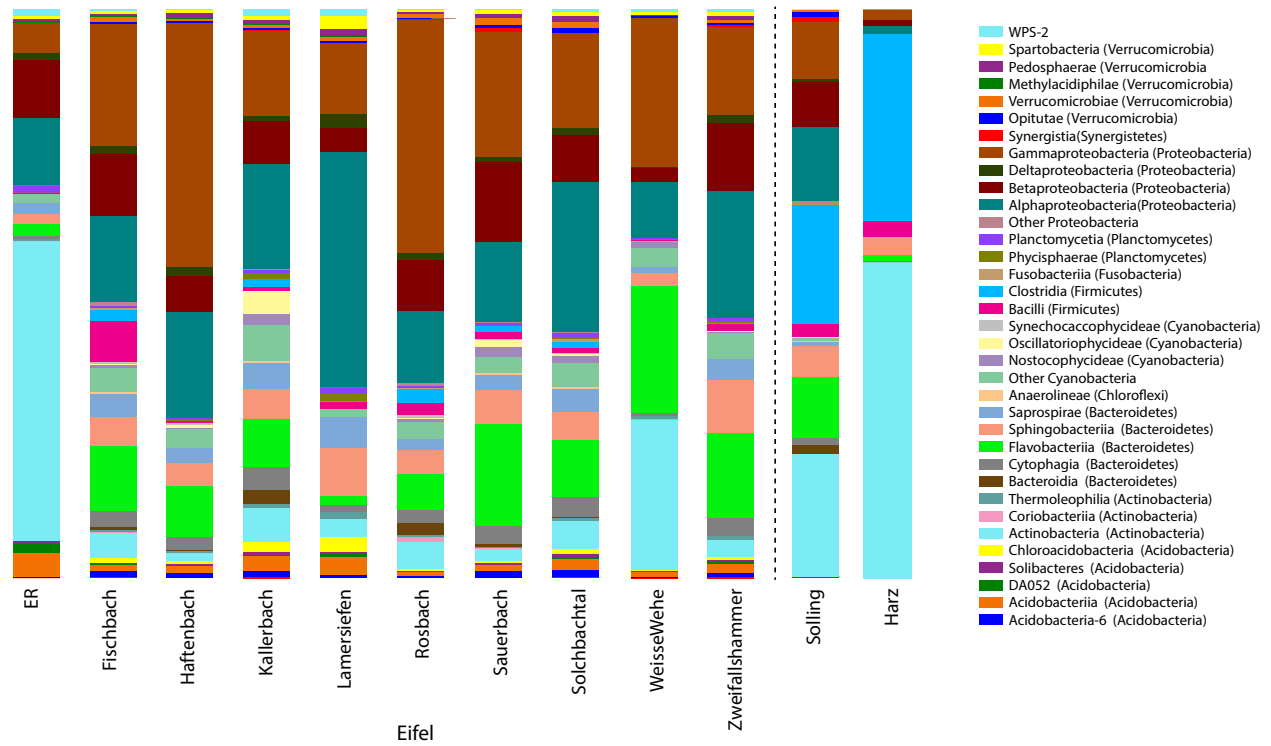

**Figure S2.** Principle Coordinate Analysis of Bray-Curtis distance of fire salamander skin microbial communities from multiple regions and locations across Germany. Skin microbial community structure differed significantly across locations. (A&B) display sample separation on PCo axis 1 and 2. (C&D) display sample separation on PCo axis 1 and 3. Plots (B) and (C) differentiate sites from the Eifel region of Germany.

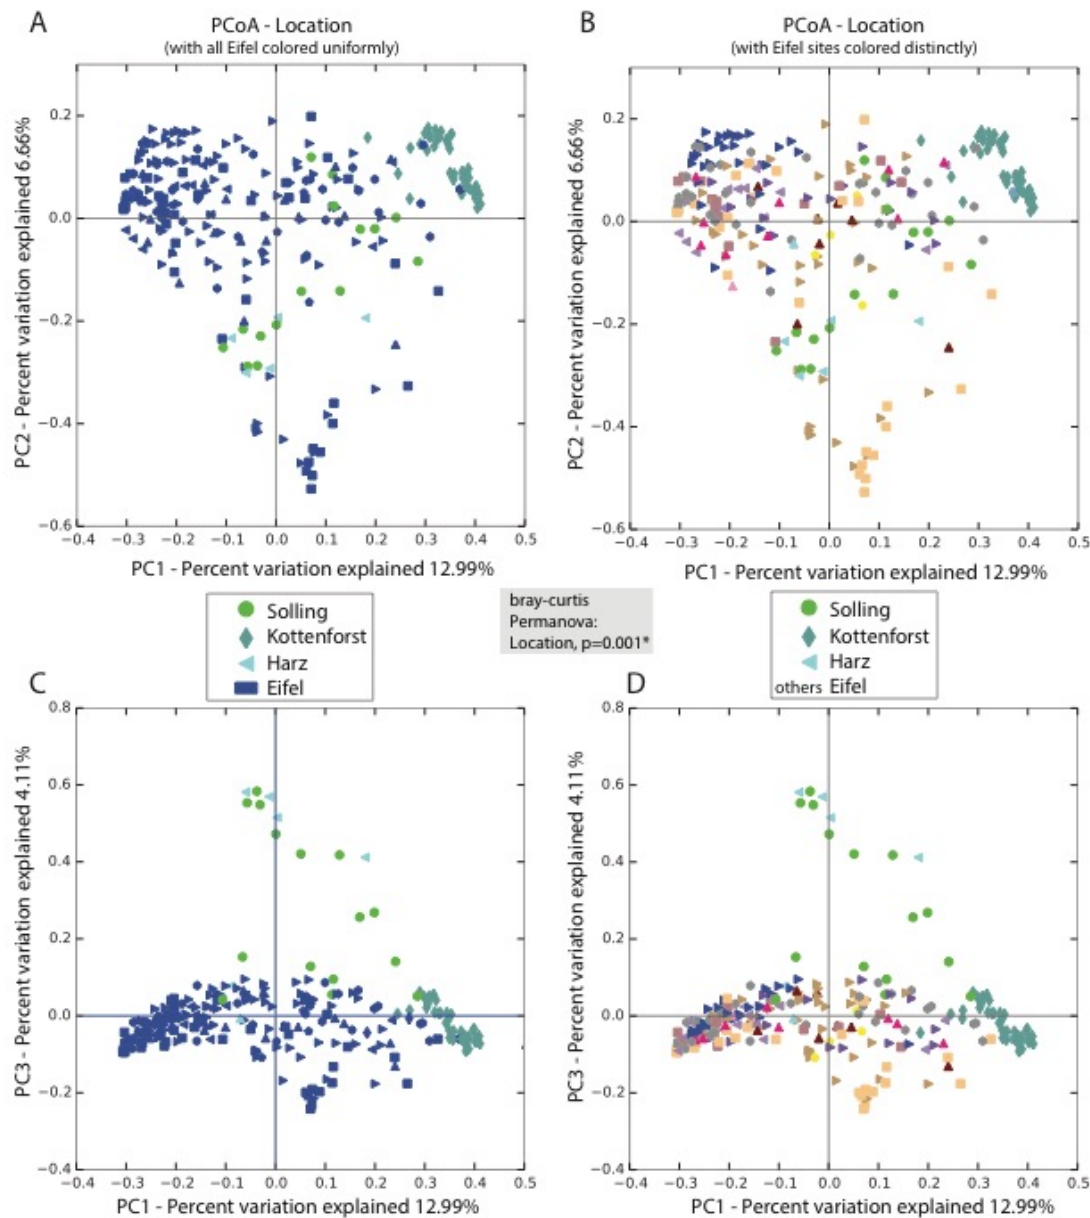

**Supplementary Figure 3.** Alpha diversity of salamander skin microbiota in response to *Bsal* infection. Blue color indicates the before exposure time point and orange indicates the after time point (i.e. 10 days post infection). Statistical results from linear mixed models are provided evaluating the factors of time (Before vs After) and treatment (Bsal vs Control).

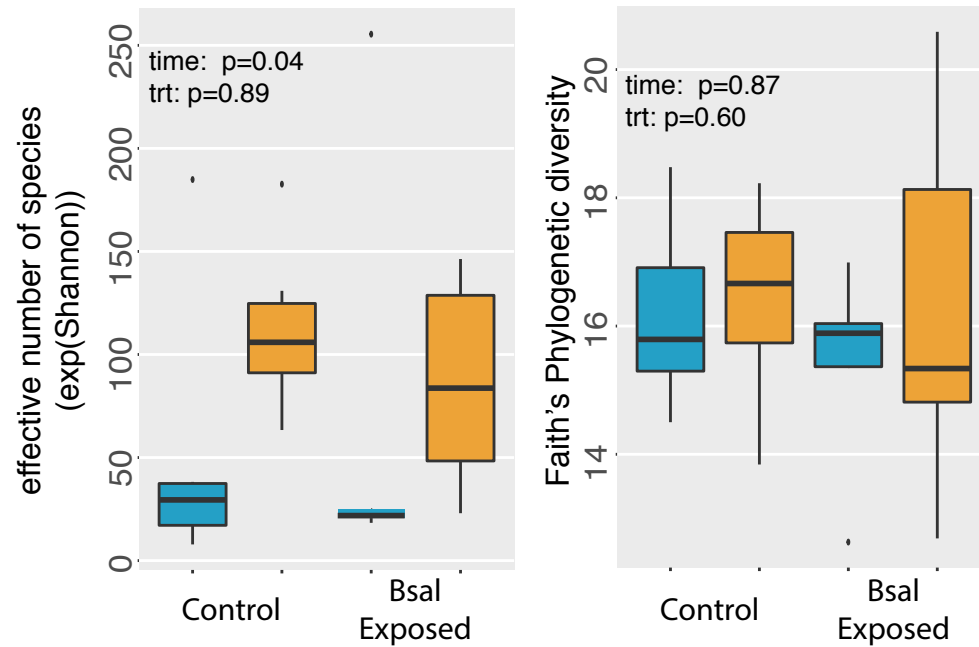

Supplement: Supplementary file 1 [file 12699458]
